# Supplementary material for: Asymmetric sky-blue thermally-activated delayed fluorescence emitters bearing tris(triazolo)triazine moiety for solution-processable organic light-emitting diodes
Source: Royal Society of Chemistry journal article supplement (doi:10.1039/d1tc05372h), 2022-01-01
Supplement: d1tc05372h1.pdf [file d1tc05372h1.pdf]

**Asymmetric Sky-Blue Thermally Activated Delayed  
Fluorescence Emitters Bearing Tris(triazolo)triazine Moiety for  
Solution Processable Organic Light-Emitting Diodes**

Zhou Fang,<sup>a</sup> Shengyue Wang,<sup>a</sup> Junxu Liao,<sup>b</sup> Xinrui Chen,<sup>a</sup> Yuanyuan Zhu,<sup>a</sup> Weiguo  
Zhu<sup>a\*</sup>, Yafei Wang<sup>a\*</sup>

*<sup>a</sup>Jiangsu Collaborative Innovation Center of Photovoltaic Science and Engineering, Jiangsu  
Engineering Laboratory of Light-Electricity-Heat Energy-Converting Materials and Applications,  
School of Materials Science & Engineering, Changzhou University, Changzhou 213164, China.*

Email: W. Zhu: [zhuwg18@126.com](mailto:zhuwg18@126.com); Y. Wang: [qiji830404@hotmail.com](mailto:qiji830404@hotmail.com)

*<sup>b</sup>School of Chemical Engineering and Energy Technology, Dongguan University of Technology,  
Dongguan, 523808, China*

## *Contents*

### **Experimental part**

**Figure S1.** Chemical structures and performances of the reported TTT-based TADF emitters.

***NMR & MS spectra (Figure S2-S11).***

**Figure S12.** TGA curves of the compounds at N<sub>2</sub> atmosphere with a heating rate of 20°C min<sup>-1</sup>.

**Figure S13.** PL spectra of TTT-Ac and TTT-2Ac in different solvent at room temperature.

**Table S1.** Calculated Photophysical data of the TADF emitters.

**Figure S14.** CV curves of compounds in CH<sub>3</sub>CN solution.

**Figure S15.** The energy level diagrams and chemical structures of the materials in the devices.

**Figure S16.** CIE coordinates of the devices: (a): TTT-Ac (b) TTT-2Ac.

**Figure S17.** The EL performance of solution-processed devices.

**Table S2.** EL data for the devices based on TTT-Ac with different EML thickness.

**Figure S18.** Comparison of electroluminescence performances between reported TADF emitters based on the tris(triazolo)triazine moiety and the new ones.

## Experimental part

All synthetic materials are commercial from Energy Chemical Company Ltd. and used in the reaction directly. All reactions were carried out under N<sub>2</sub> atmosphere.

In order to determine the structure of the compound, <sup>1</sup>H NMR and <sup>13</sup>C NMR spectra were acquired using a Bruker Dex-300/400 NMR instrument using CDCl<sub>3</sub> as a solvent. The NMR chemical shifts are reported in ppm with reference to residual protons and carbons of CDCl<sub>3</sub> ( $\delta$  7.26 ppm in <sup>1</sup>H NMR,  $\delta$  77.0 ppm in <sup>13</sup>C NMR). Mass spectra (MS) were recorded on a Bruker Autoflex MALDI-TOF instrument using dithranol as a matrix.

Thermogravimetric analysis (TGA) was detected with a NETZSCH STA449 from 25°C to 600°C at a 20°C/min heating rate under N<sub>2</sub> atmosphere. To reveal the photophysical properties of emitters, UV-vis absorption spectra were measured by a SHIMADZU UV-1650PC. Steady-state photoluminescence (PL) spectra were obtained with a PTI QuantaMaster 40 steady-state fluorescence spectrofluorometer at room temperature. The luminescence lifetime, low temperature (77 K) fluorescence and phosphorescence spectra of the compounds in solution/film were measured with an Edinburgh FLS1000 transient-fluorescence spectrophotometer. Electrochemical property was evaluated by cyclic voltammetry with three typical electrodes in degassed CH<sub>3</sub>CN solution with a rate of 100 mV/s in using a 273A (Princeton Applied Research). The CV system employed Bu<sub>4</sub>NPF<sub>6</sub> as electrolyte. Platinum disk was used as the working electrode, platinum wire was regarded as the counter electrode and silver wire was used as the reference electrode. Ferrocenium/ferrocene

(Fc/Fc<sup>+</sup>) was used as the external standard compound. Each oxidation potential was calibrated using ferrocene as a reference.

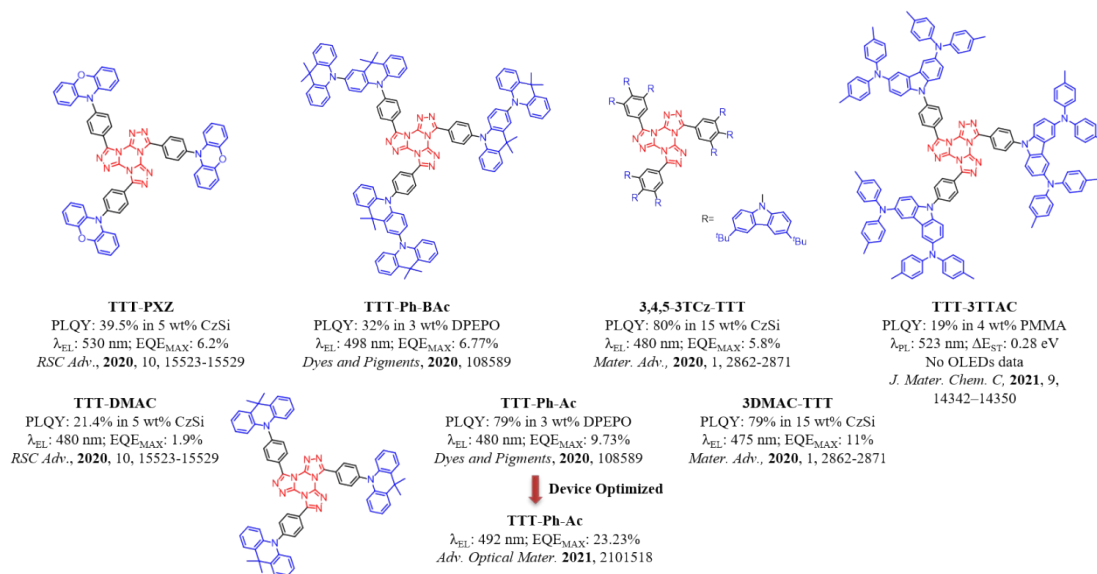

**Figure S1.** Chemical structures and performances of the reported TTT-based TADF emitters.

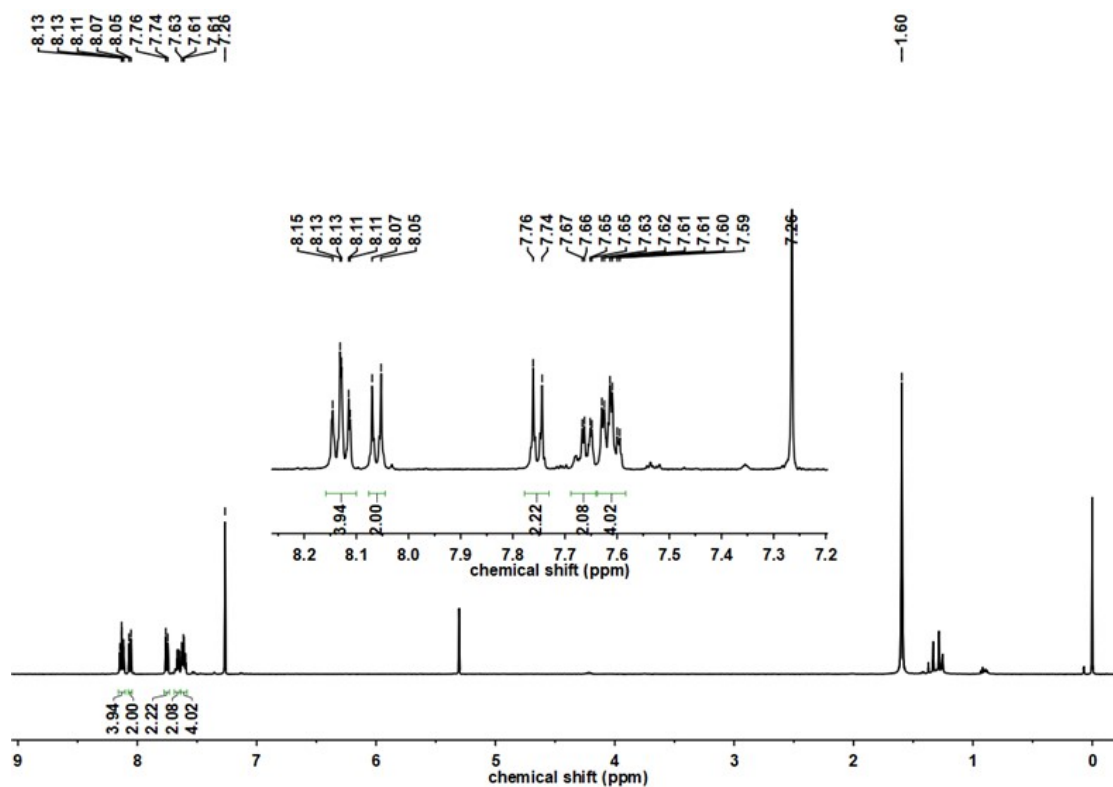

**Figure S2.**  $^1\text{H}$  NMR spectrum of TTT-Br in  $\text{CDCl}_3$ .

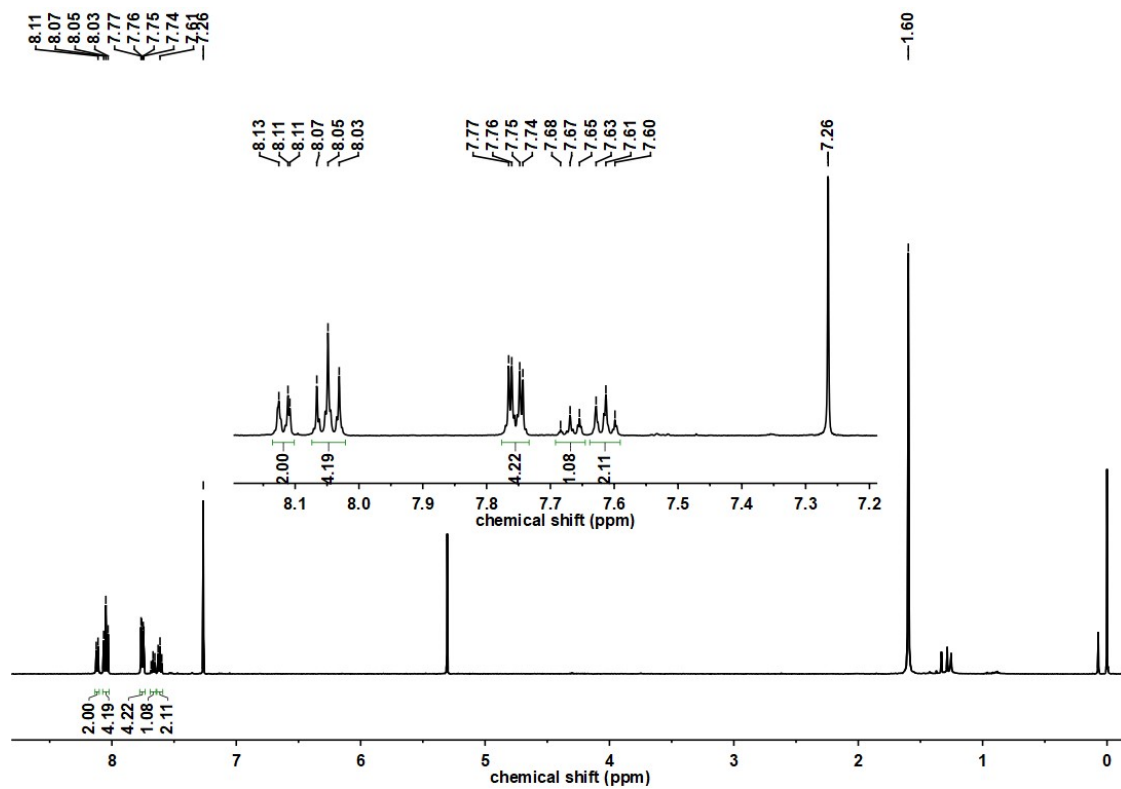

Figure S3.  $^1\text{H}$  NMR spectrum of TTT-2Br in  $\text{CDCl}_3$ .

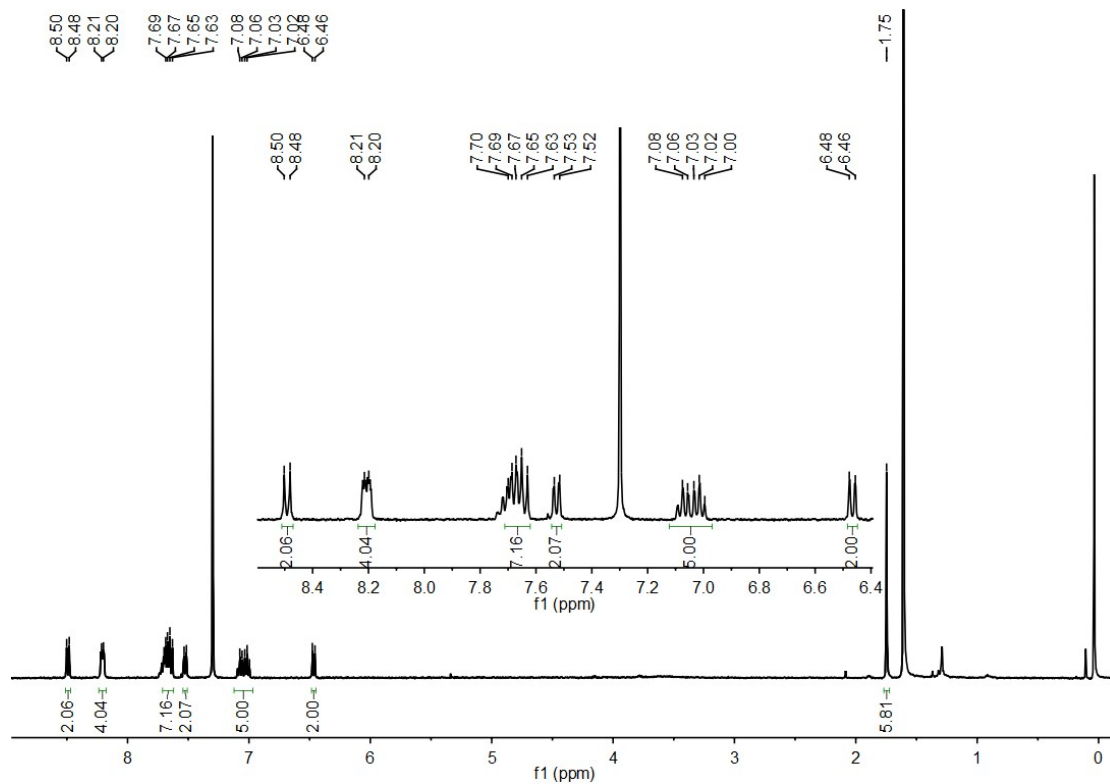

Figure S4.  $^1\text{H}$  NMR spectrum of TTT-Ac in  $\text{CDCl}_3$ .

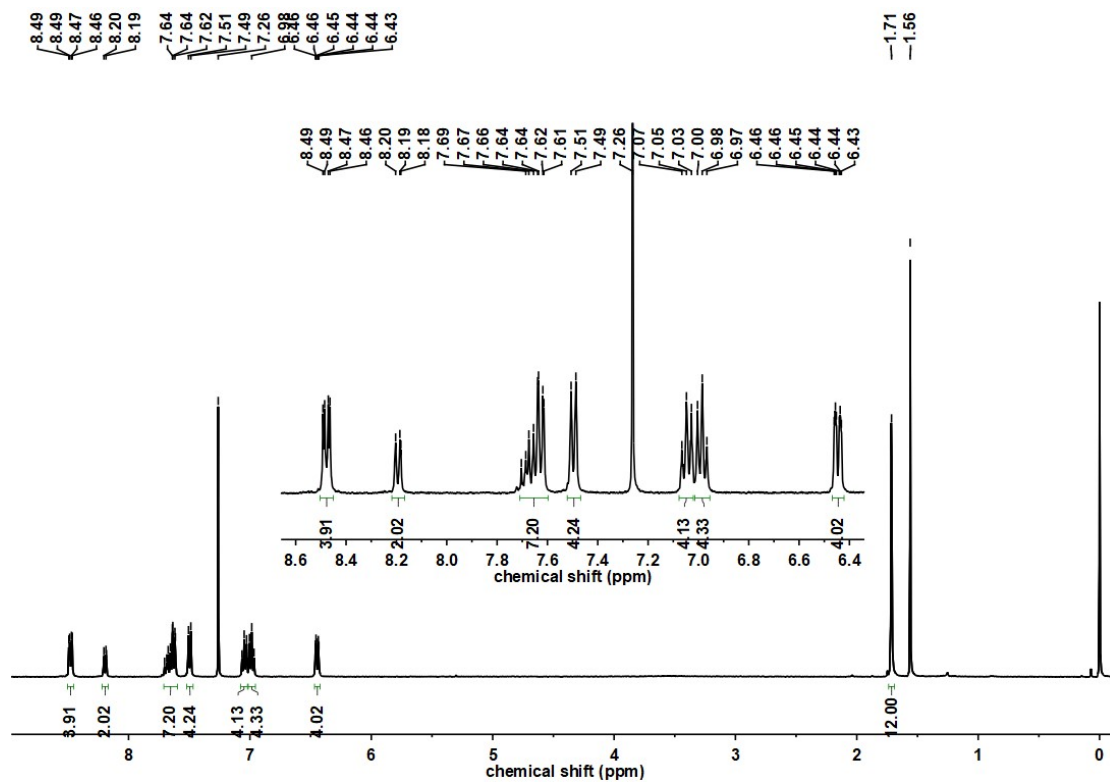

Figure S5.  $^1\text{H}$  NMR spectrum of TTT-2Ac in  $\text{CDCl}_3$ .

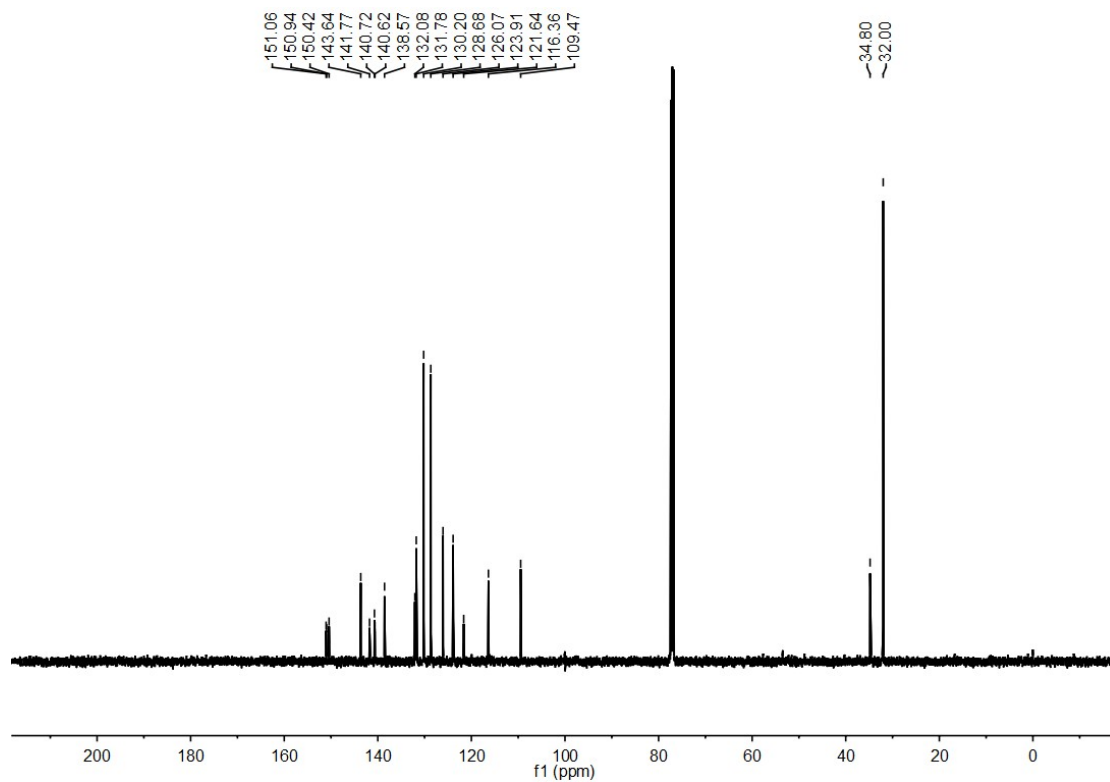

Figure S6.  $^{13}\text{C}$  NMR spectrum of TTT-Ac in  $\text{CDCl}_3$ .

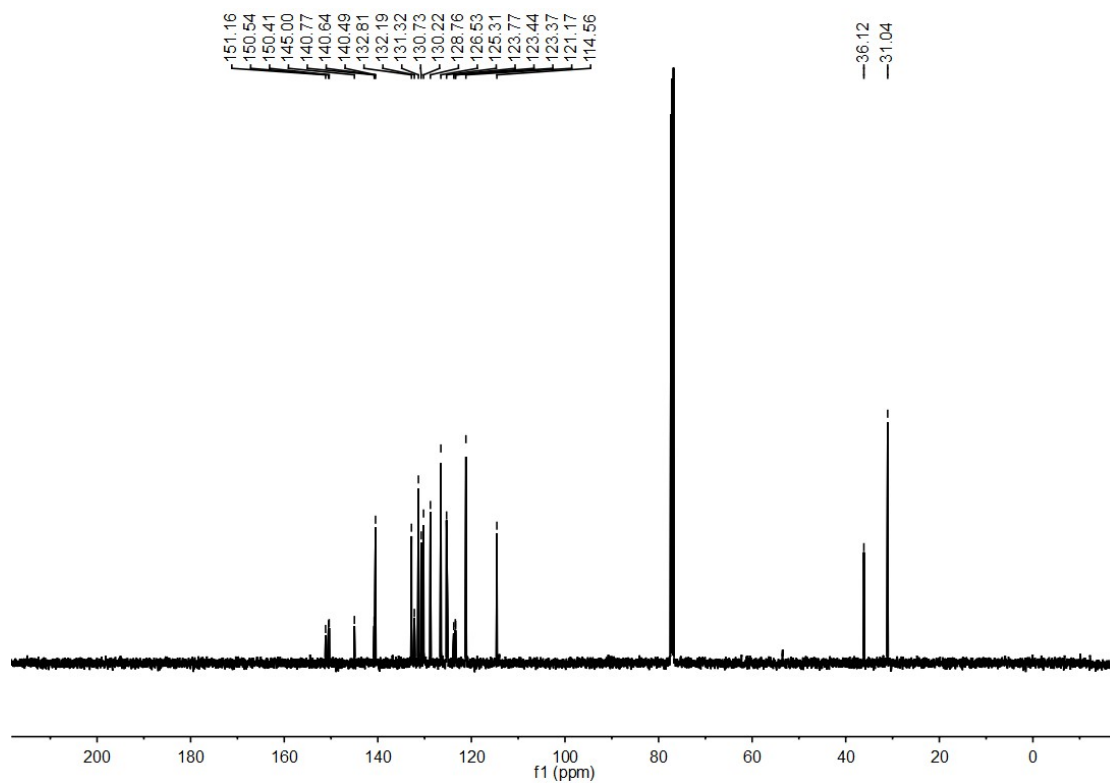

Figure S7.  $^{13}\text{C}$  NMR spectrum of TTT-2Ac in  $\text{CDCl}_3$ .

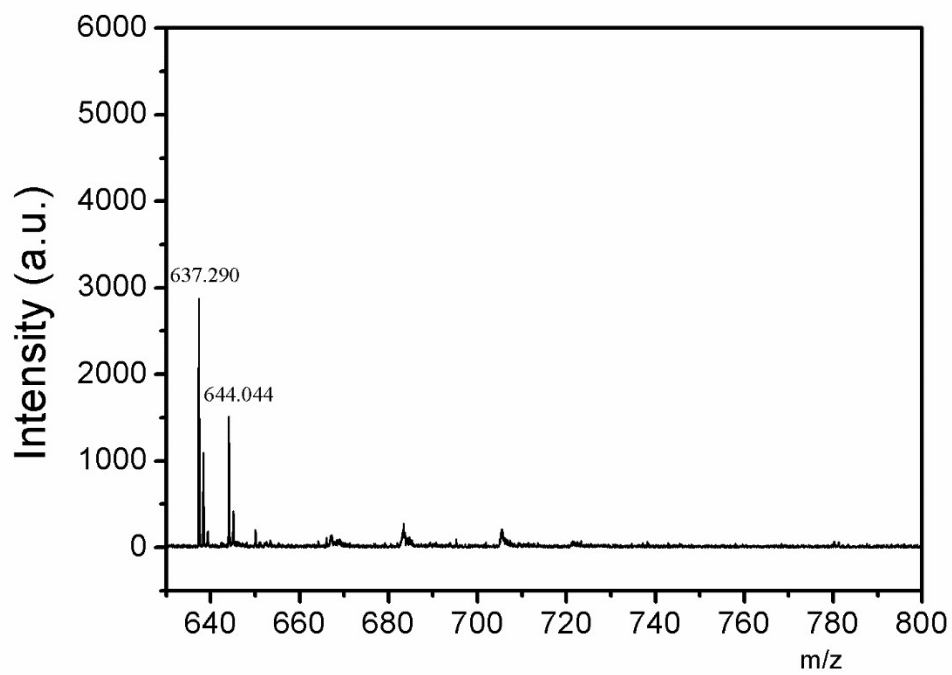

Figure S8. TOF-MS spectrum of TTT-Ac.



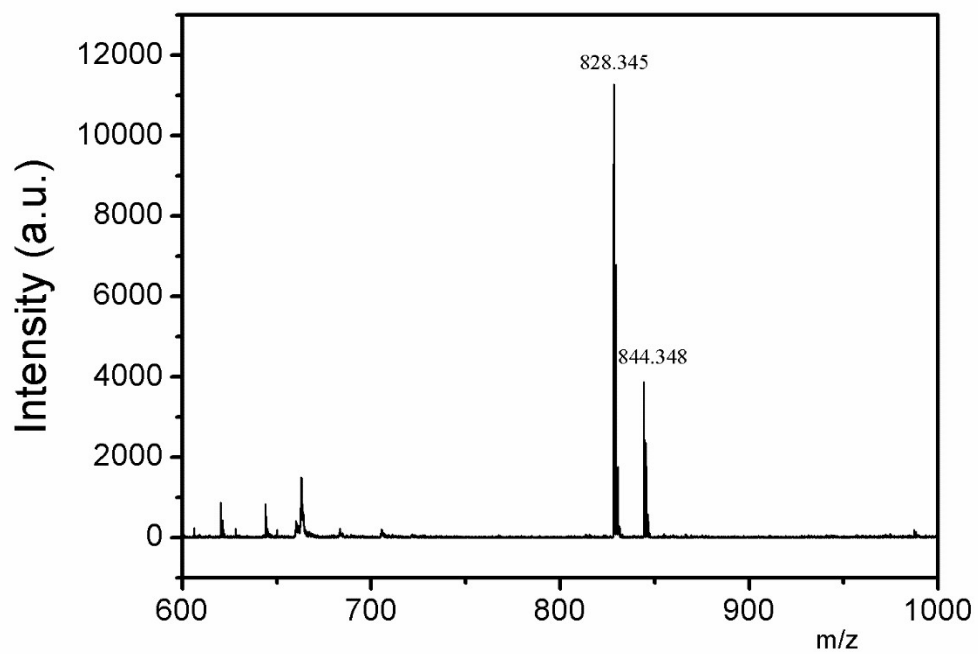

**Figure S9.** TOF-MS spectrum of TTT-2Ac.

# MALDI,TTT-AC,20211213

## Analysis Info

Acquisition D12/13/2021 5:48:02  
 RM  
 Analysis Name D:\Data\MALDI\2021\1213\TTT-AC\_0\_A14\_000001.d  
 Method MALDI\_P\_100-3000 Operator  
 Sample Name MURU-N-ESI Instrument solarix  
 Comment

## Acquisition Paramet

|                     |            |                    |           |                  |                     |
|---------------------|------------|--------------------|-----------|------------------|---------------------|
| Acquisition Mode    | Single MS  | Acquired Scans     | 3         | Calibration Date | Fri Dec 10 05:30:00 |
| Polarity            | Positive   | No. of Cell Fills  | 1         | Data Acquisition | 2027152             |
| Broadband Low Mass  | 202.1 m/z  | No. of Laser Shots | 10        | Date Processing  | 4194304             |
| Broadband High Mass | 1200.0 m/z | Laser Power        | 18.8 lp   | Calibration      | Sine-Bell           |
| Delay               | 0.001 sec  | Laser Shot         | 0.020 sec | Multiplication   |                     |
| Accumulation Time   | 0.100 sec  | Frequency          |           |                  |                     |

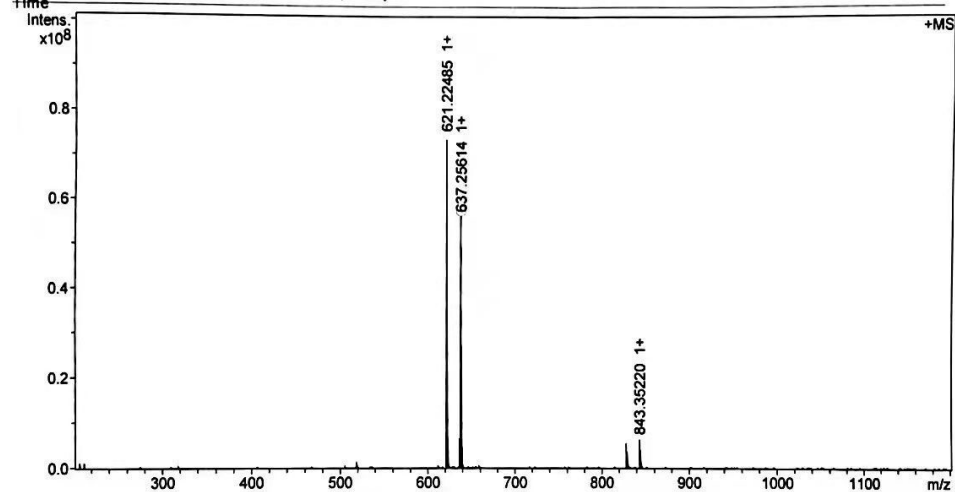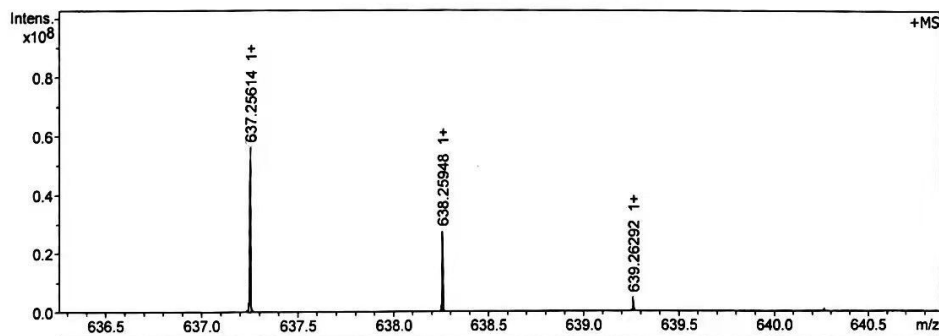

| Meas. m/z  | # Ion | Formula   | Score  | m/z err    | [ppm] | Mean err | [ppm] | mSigma | rdb  | e <sup>-</sup> | Conf | N-Rule |
|------------|-------|-----------|--------|------------|-------|----------|-------|--------|------|----------------|------|--------|
| 637.256144 | 1     | C39H29N10 | 100.00 | 637.257117 | 1.5   |          | 1.2   | 15.3   | 30.5 | even           |      | ok     |

Figure S10. HRMS spectrum of TTT-Ac in CH<sub>2</sub>Cl<sub>2</sub>.

# MALDI, TTT-ZAC, 20211213

## Analysis Info

Acquisition D 12/13/2021 5:46:53  
FM

Analysis Name D:\Data\MALDI\2021\1213\TTT-ZAC\_0\_A13\_000001.d  
Method MALDI\_P\_100-3000  
Sample Name MURU-N-ESI  
Comment

Operator  
Instrument solarix

## Acquisition Paramet

|                    |            |                    |           |                       |                          |
|--------------------|------------|--------------------|-----------|-----------------------|--------------------------|
| Acquisition Mode   | Single MS  | Acquired Scans     | 3         | Calibration Date      | Fri Dec 10 05:30:00      |
| Polarity           | Positive   | No. of Cell Fills  | 1         | Data Acquisition Date | 20211213                 |
| Broadband Low Mass | 202.1 m/z  | No. of Laser Shots | 10        | Data Processing       | 4194304                  |
| Broadband High     | 1600.0 m/z | Laser Power        | 18.8 lp   | Ionization            | Sine-Bell Multiplication |
| Source             | 0.001 sec  | Laser Shot         | 0.020 sec |                       |                          |
| Accumulation       | 0.100 sec  | Frequency          |           |                       |                          |

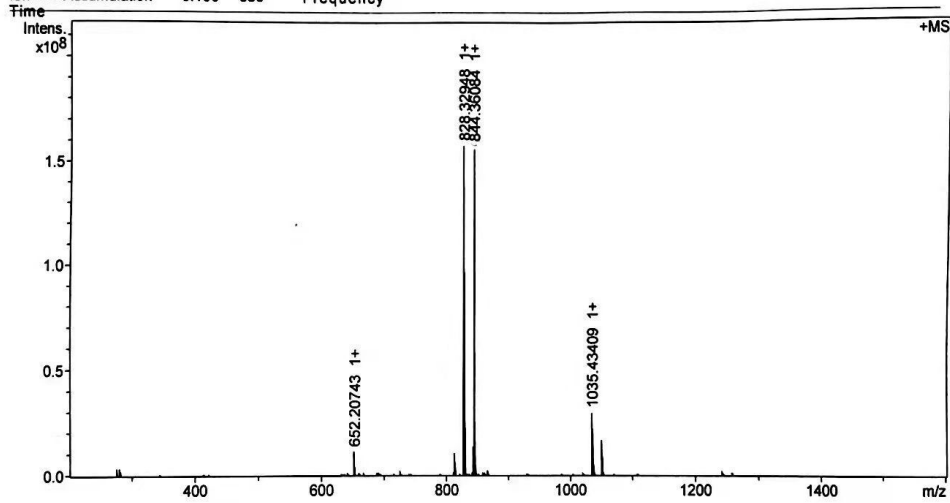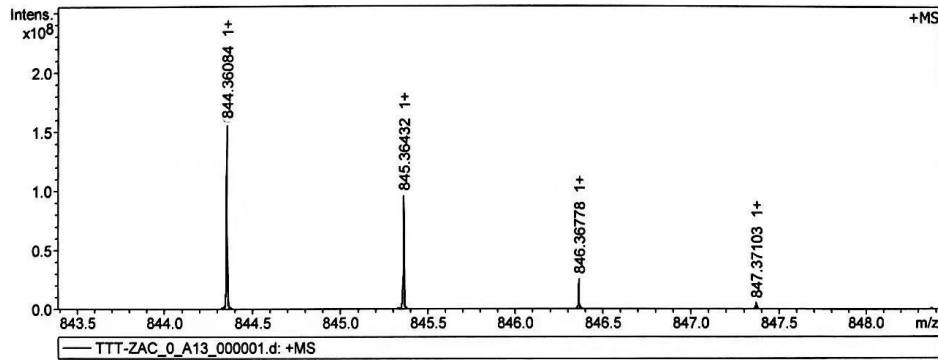

| Meas.      | m/z | # Ion     | Formula | Score      | m/z err | [ppm] | Mean | err  | [ppm] | mSigma | rdb | e <sup>-</sup> | Conf | N-Rule |
|------------|-----|-----------|---------|------------|---------|-------|------|------|-------|--------|-----|----------------|------|--------|
| 844.360839 | 1   | C54H42N11 | 100.00  | 844.361917 | 1.3     | 0.9   | 17.4 | 39.5 | even  | ok     |     |                |      |        |

Figure S11. HRMS spectrum of TTT-2Ac in CH<sub>2</sub>Cl<sub>2</sub>.

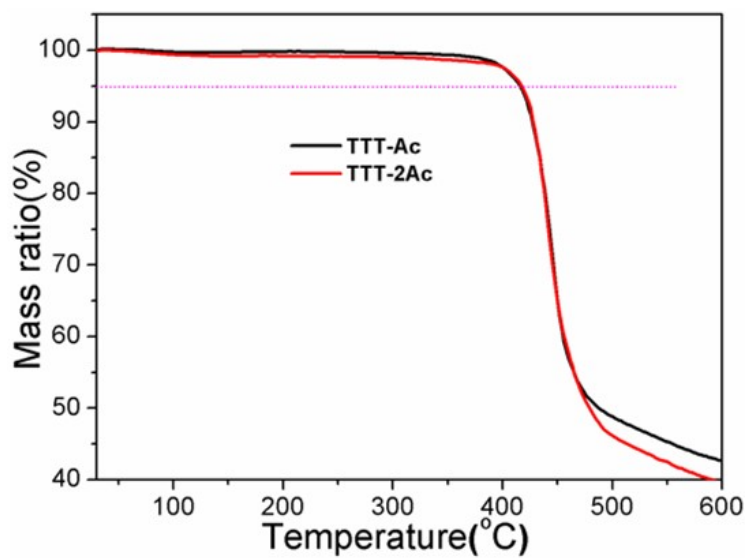

**Figure S12.** TGA curves of the compounds at  $N_2$  atmosphere with a heating rate of  $20^\circ C \text{ min}^{-1}$ .

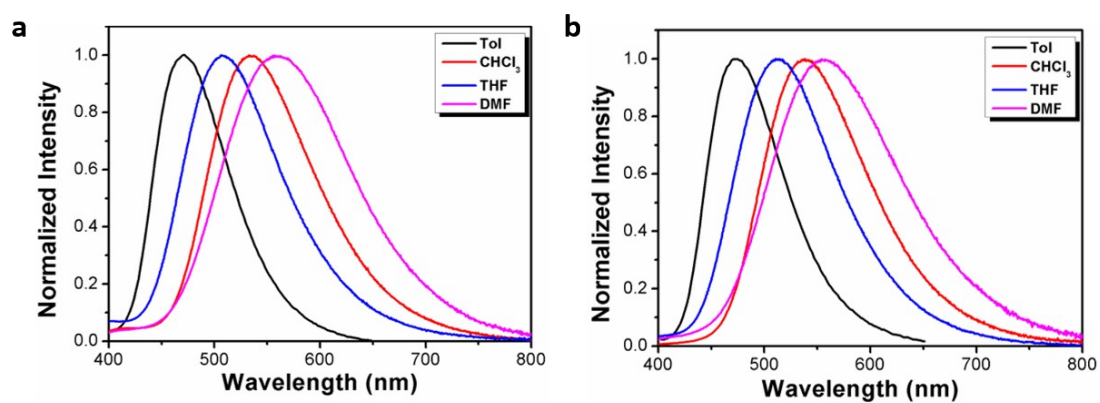

**Figure S13.** PL spectra of TTT-Ac (a) and TTT-2Ac (b) in different solvents at room temperature.

**Table S1.** Calculated Photophysical data of the TADF emitters.

| Compound | $\tau_p/\Phi_p$<br>(ns/%) | $\tau_d/\Phi_d$<br>( $\mu$ s/%) | $k_p$<br>( $10^7$ s <sup>-1</sup> ) | $k_d$<br>( $10^4$ s <sup>-1</sup> ) | $k_{ISC}$<br>( $10^7$ s <sup>-1</sup> ) | $k_{rISC}$<br>( $10^4$ s <sup>-1</sup> ) | $k_r$<br>( $10^7$ s <sup>-1</sup> ) | $k_{nr}$<br>( $10^4$ s <sup>-1</sup> ) |
|----------|---------------------------|---------------------------------|-------------------------------------|-------------------------------------|-----------------------------------------|------------------------------------------|-------------------------------------|----------------------------------------|
| TTT-Ac   | 10.9/21                   | 27.2/42                         | 9.17                                | 3.68                                | 7.24                                    | 9.32                                     | 1.93                                | 1.72                                   |
| TTT-2Ac  | 11.9/10                   | 20/37                           | 8.4                                 | 5                                   | 7.56                                    | 20.55                                    | 0.84                                | 2.95                                   |

$$k_p = 1/\tau_p \quad (1)$$

$$k_d = 1/\tau_d \quad (2)$$

$$k_{ISC} = (1-\Phi_p)k_p \quad (3)$$

$$k_{rISC} = k_p k_d \Phi_d / k_{ISC} \Phi_p \quad (4)$$

$$k_r = \Phi_p / \tau_p \quad (5)$$

$$k_{nr} = k_d - \Phi_p k_{rISC} \quad (6)$$

Herein,  $\tau_p$  and  $\tau_d$  are the lifetime of prompt and delayed components.  $\Phi_p$  and  $\Phi_d$  are the prompt and delayed luminescence quantum efficiency, respectively. The  $k_p$  and  $k_d$  are the rate constant of prompt and delayed fluorescence.  $k_{ISC}$  is the rate constant of intersystem crossing, while  $k_{rISC}$  is the rate constant of reverse intersystem crossing between the  $S_1$  and  $T_1$ .  $k_r$  and  $k_{nr}$  are the radiative and nonradiative decay rate constant from  $S_1$  to  $S_0$ , respectively.

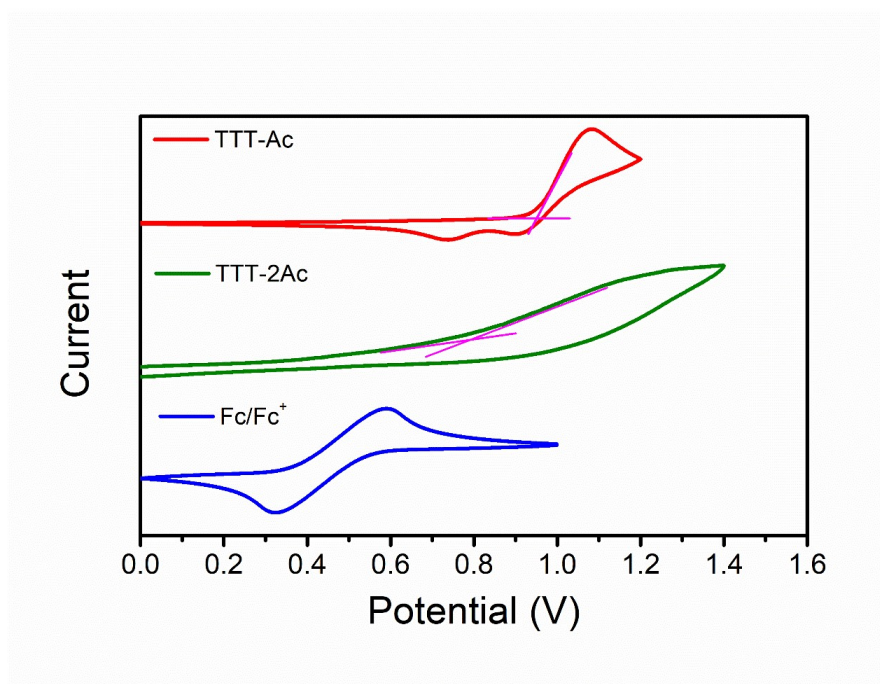

**Figure S14.** CV curves of compounds in CH<sub>3</sub>CN solution.

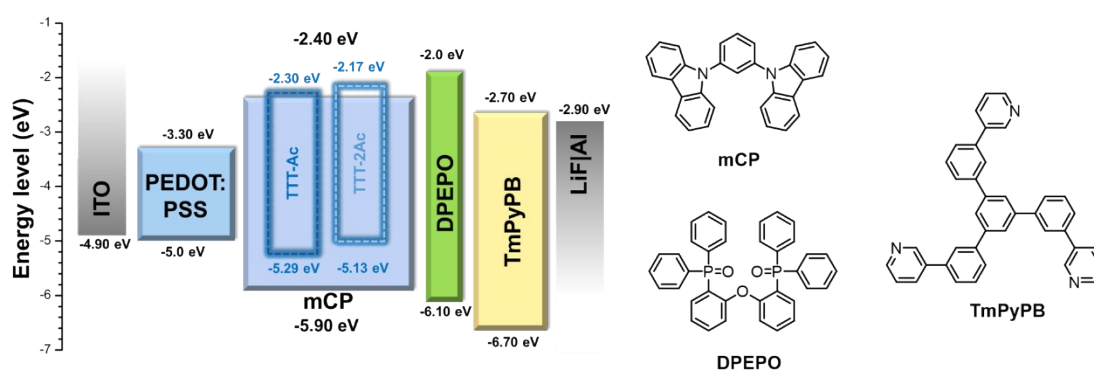

**Figure S15.** The energy level diagrams and chemical structures of the materials in the devices.

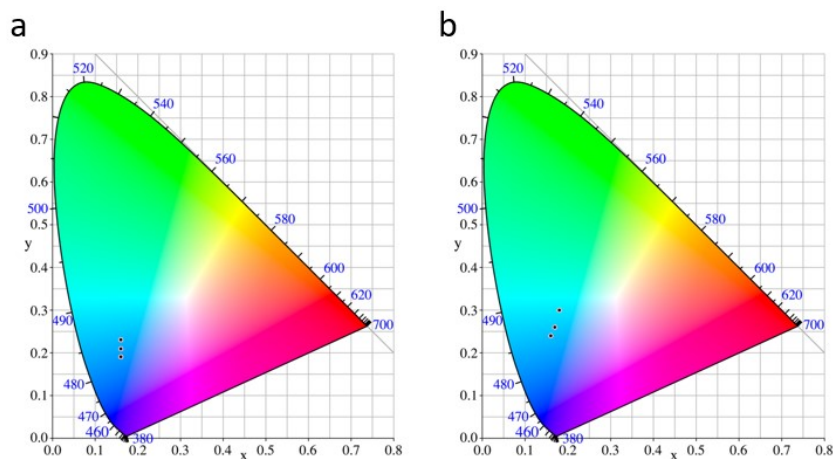

**Figure S16.** CIE coordinates of the devices: (a): TTT-Ac; (b) TTT-2Ac.

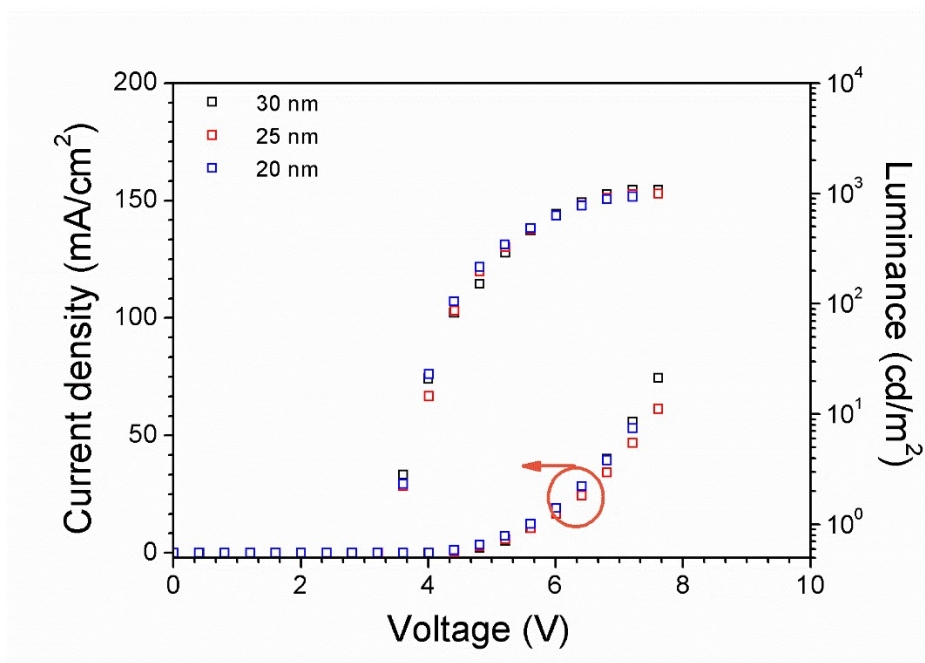

**Figure S17.** Current density-voltage-luminance (J-V-L) curves (c) of TTT-Ac with different EML thickness of 20 wt% dopants.

**Table S2.** EL data for the devices with different EML thickness.

| Material | EML Thickness (nm) | Dopant wt% | $V_{ON}$ V | $L_{max}$ cd m <sup>-2</sup> | $CE_{max}$ cd A <sup>-1</sup> | $EQE_{max}$ % | CIE (x, y)    | Peak nm |
|----------|--------------------|------------|------------|------------------------------|-------------------------------|---------------|---------------|---------|
| TTT-Ac   | 30                 | 20%        | 3.6        | 1078                         | 16.21                         | 9.26          | (0.16 , 0.21) | 470     |
|          | 25                 | 20%        | 3.6        | 996.4                        | 17.37                         | 10.01         | (0.16 , 0.22) | 474     |
|          | 20                 | 20%        | 3.6        | 935.3                        | 14.52                         | 8.48          | (0.16 , 0.23) | 470     |

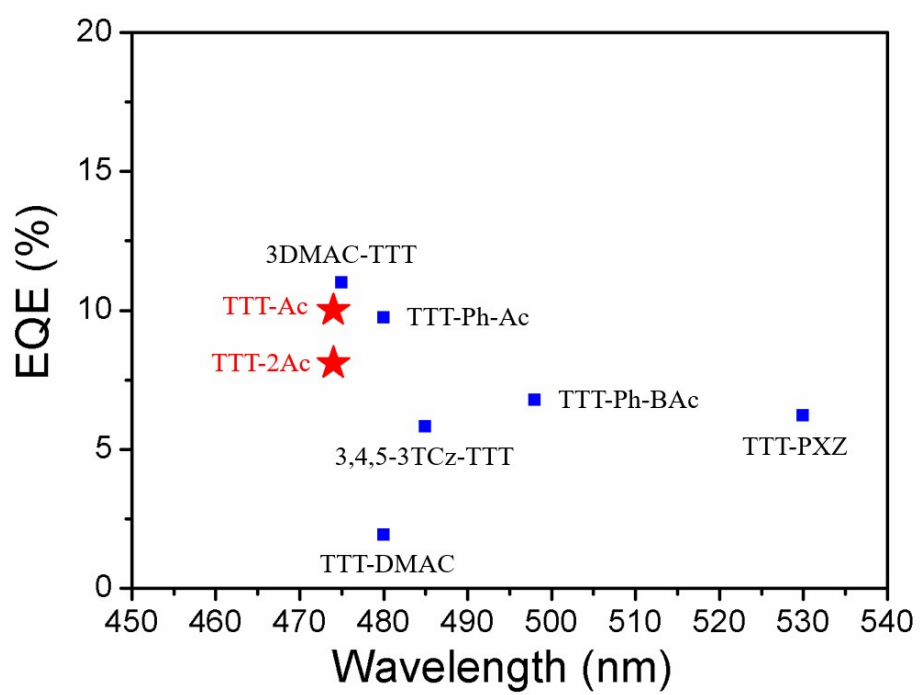

**Figure S18.** EQE-wavelength curves of the TTT-based TADF emitter.
